# Supplementary material
Source: Springer Nature journal article supplement (https://www.springermedizin.de/resource/supplementary/12936_2008_722_MOESM1_ESM.pdf/9548088)
Supplement: MOESM1 [file 9548088]

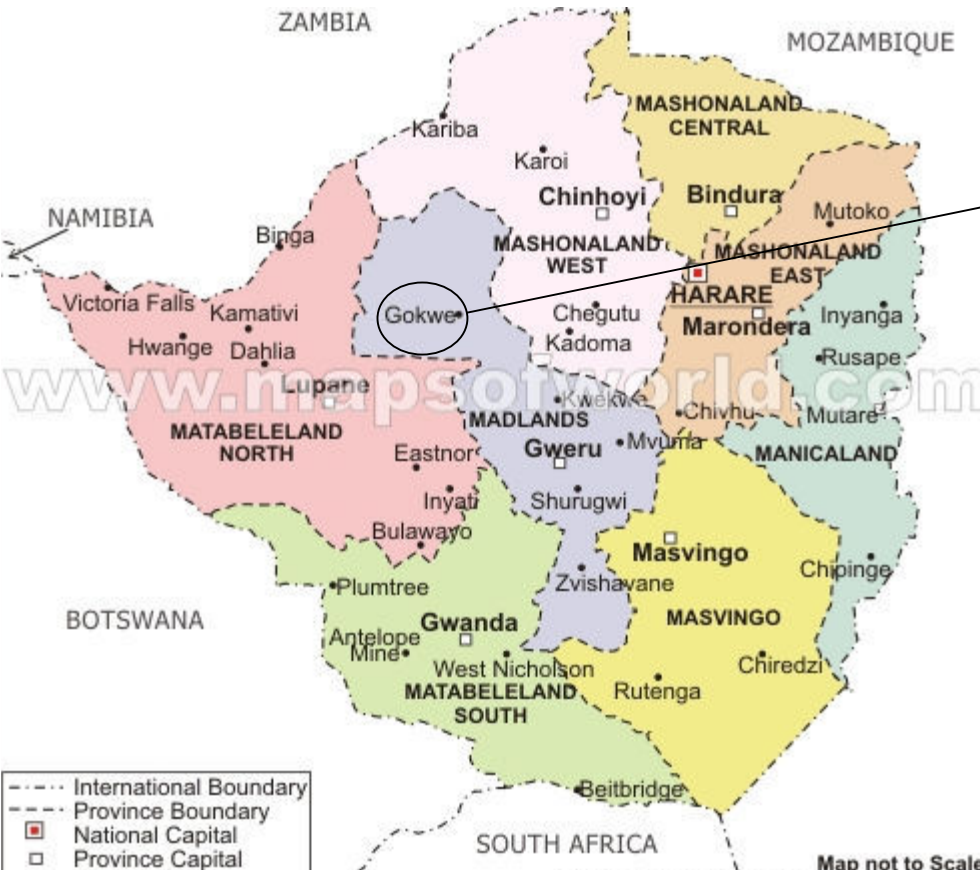

District where mosquito collections were done

- International Boundary
- Province Boundary
- National Capital
- Province Capital

Map not to Scale
